# Supplementary material for: Tuning emissive color of trivalent terbium ion through environmental factors: optoelectronic insights from theoretical, spectral and computational studies
Source: Royal Society of Chemistry journal article supplement (doi:10.1039/d4ra05334f), 2024-01-01
Supplement: d4ra05334f1.pdf [file d4ra05334f1.pdf]

## Tuning Emissive Color of Trivalent Terbium Ion through Environmental Factors: Optoelectronic Insights from Theoretical, Spectral and Computational Studies

Vandana Aggarwal<sup>a</sup>, Devender Singh<sup>a, b\*</sup>, Shri Bhagwan<sup>a</sup>, Raman Kumar Saini<sup>a</sup>, Komal Jakhar<sup>a</sup>, Sumit Kumar<sup>c</sup>, Parvin Kumar<sup>d</sup> and JayantSindhu<sup>e</sup>

<sup>a</sup>Department of Chemistry, Maharshi Dayanand University, Rohtak-124001, Haryana, India

<sup>b</sup>Department of Chemistry, Lovely Professional University, Phagwara, Jalandhar-144411, Punjab, India.

<sup>c</sup>Department of Chemistry, DCR University of Science & Technology, Murthal -131039 Haryana, India.

<sup>d</sup>Department of Chemistry, Kurukshetra University Kurukshetra -136119, Haryana, India.

<sup>e</sup>Department of Chemistry, COBS&H, CCS Haryana Agricultural University, Hisar-125004, Haryana, India.

### SUPPLEMENTARY INFORMATION

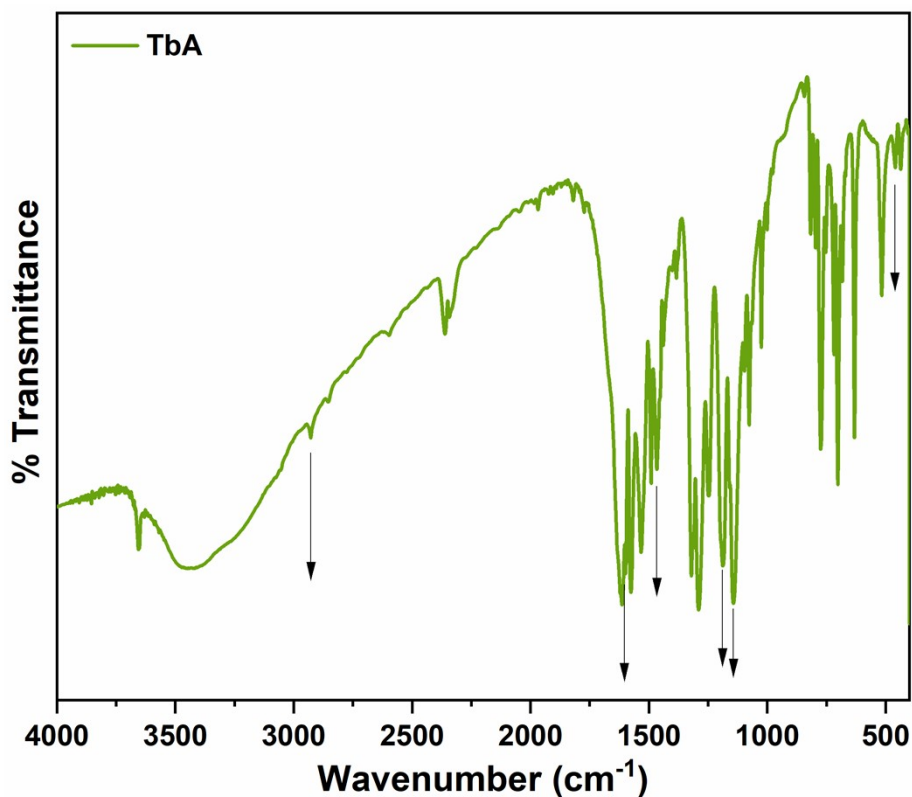

Fig. S1 IR profile of TbA

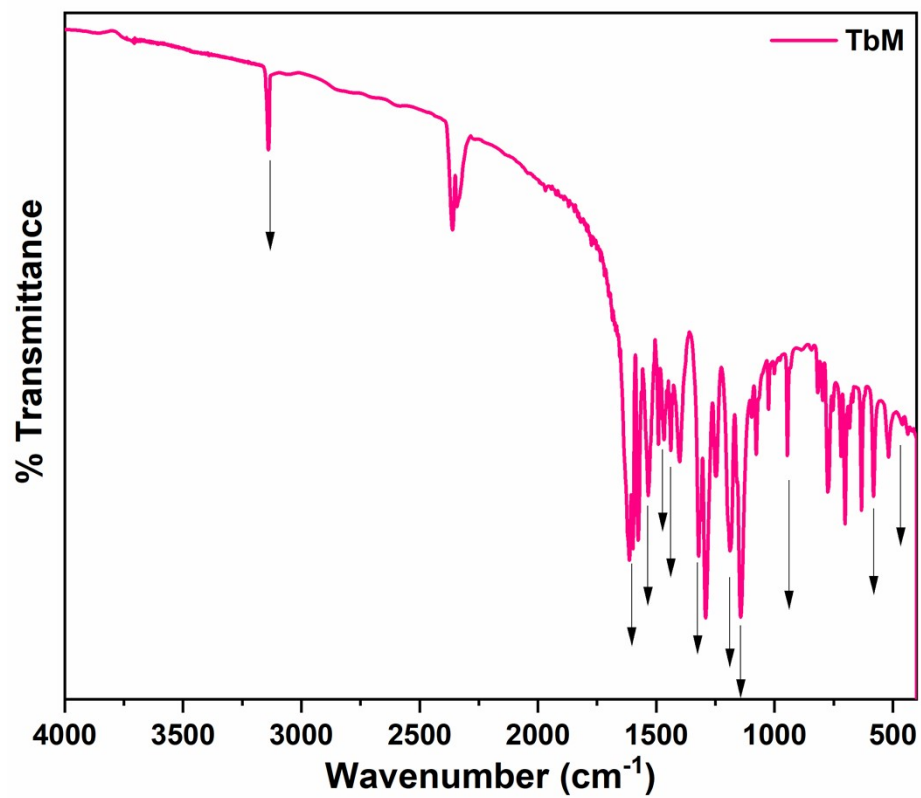

Fig. S2 IR profile of TbM

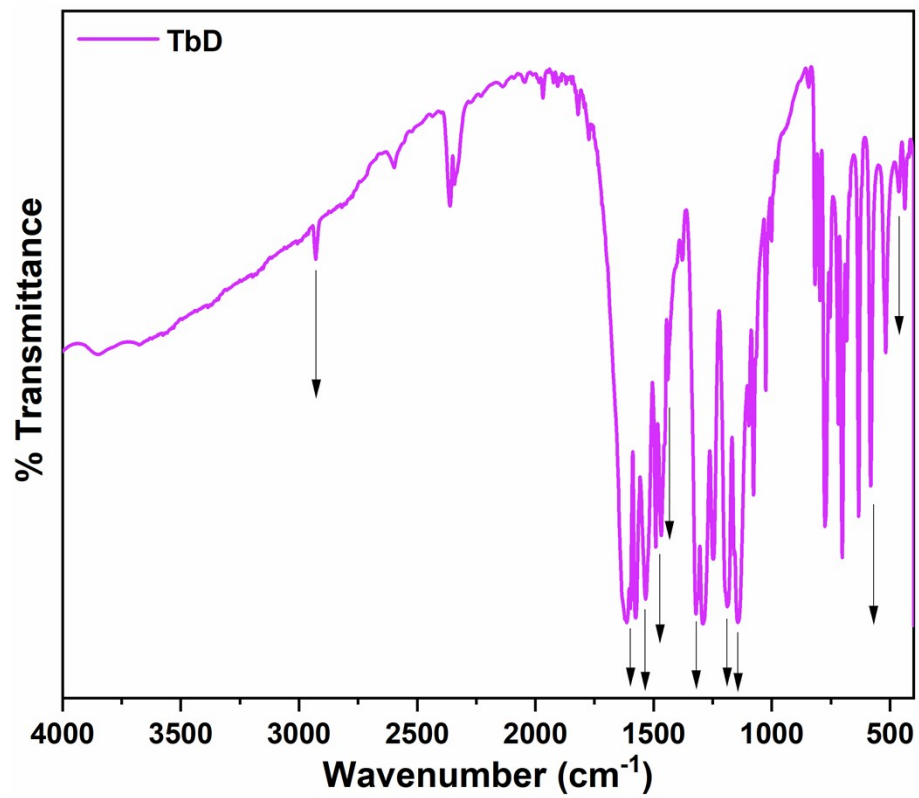

Fig. S3 IR profile of TbD

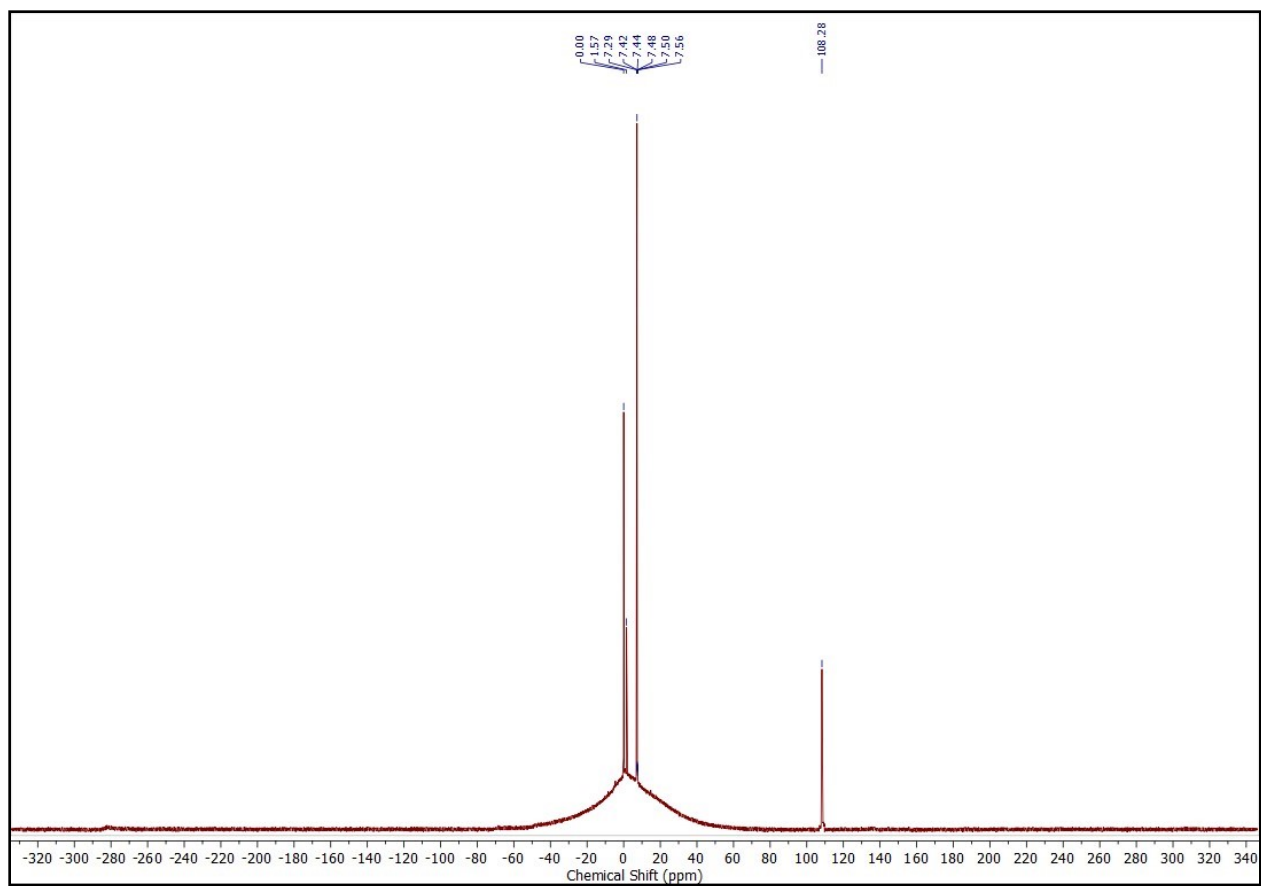

**Fig. S4** <sup>1</sup>H-NMR spectrum of TbA in CDCl<sub>3</sub>

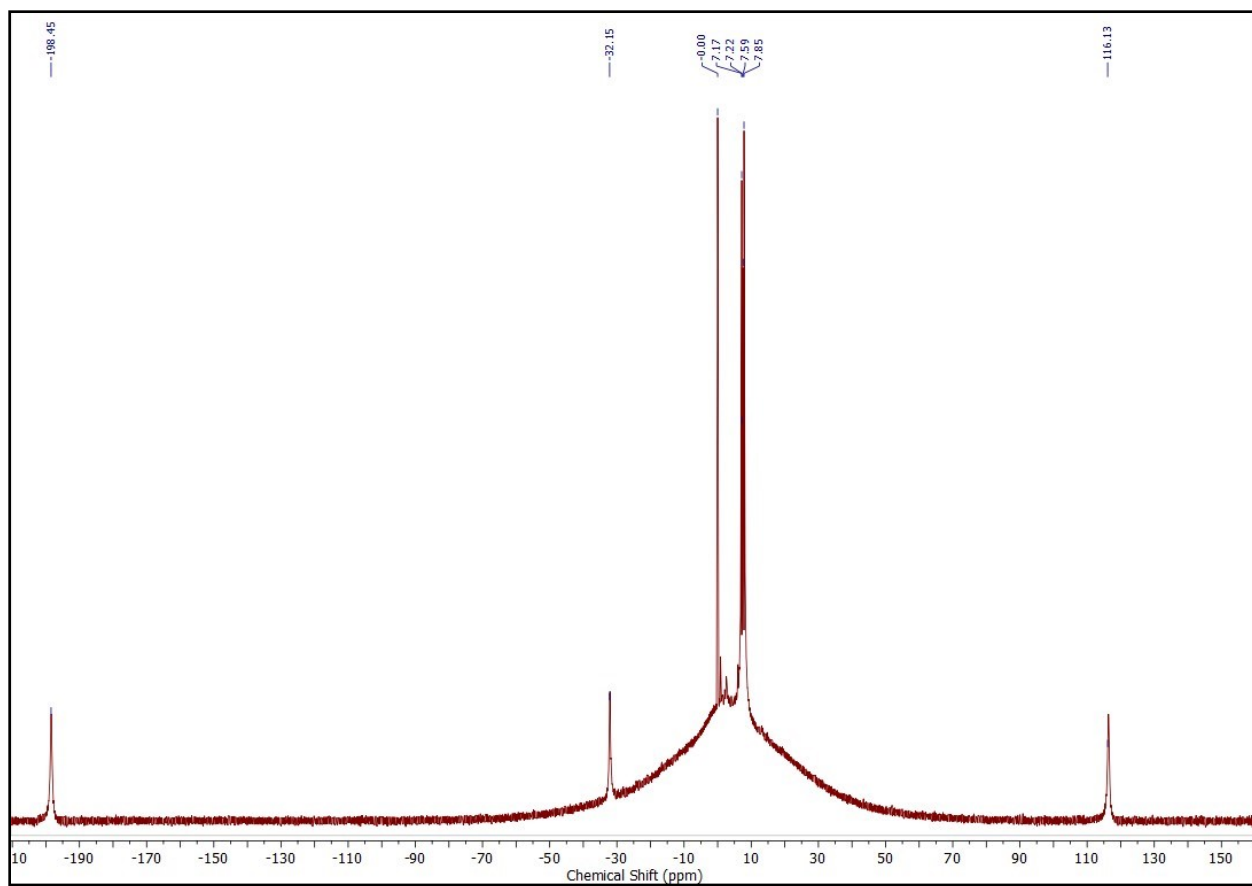

**Fig. S5** <sup>1</sup>H-NMR spectrum of TbM in CDCl<sub>3</sub>

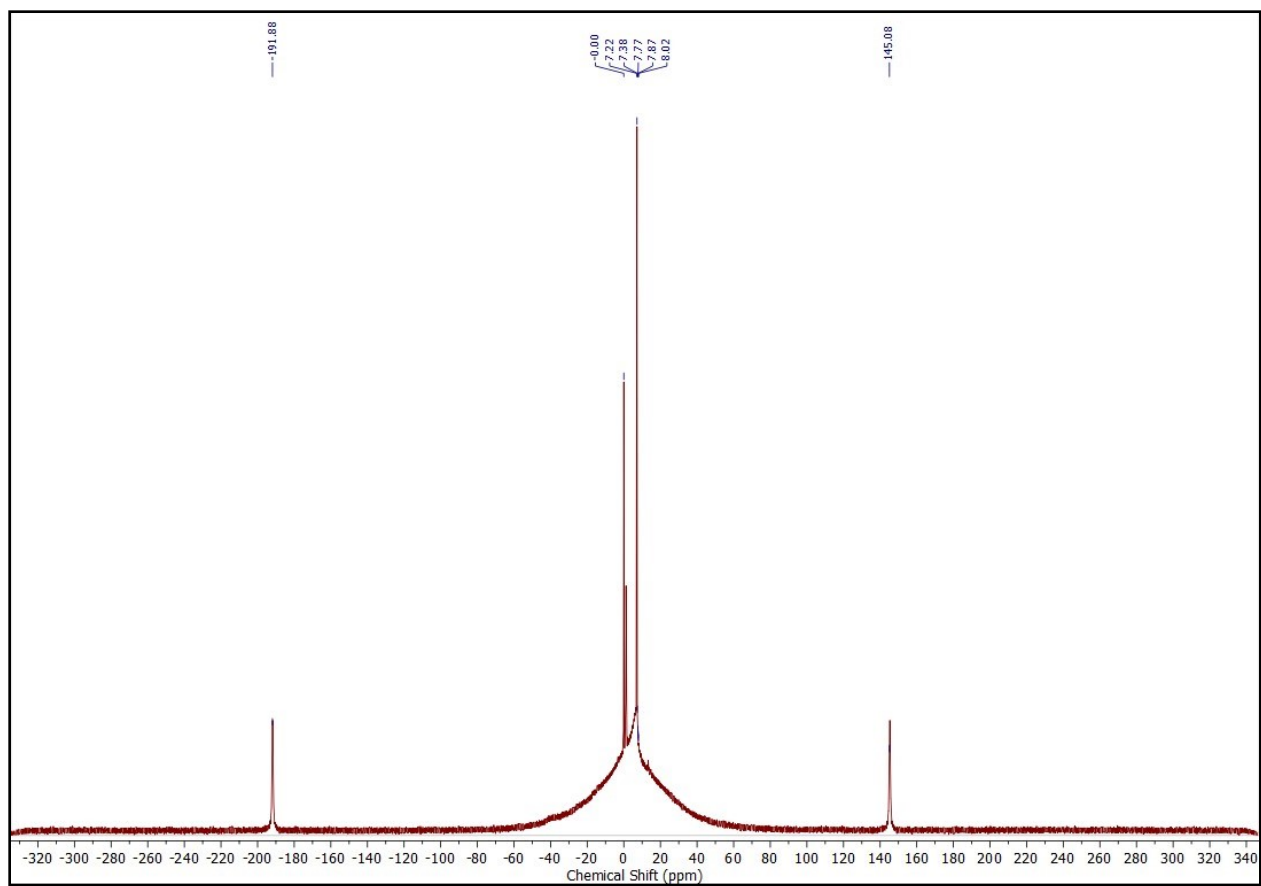

**Fig. S6**  $^1\text{H}$ -NMR spectrum of TbD in  $\text{CDCl}_3$

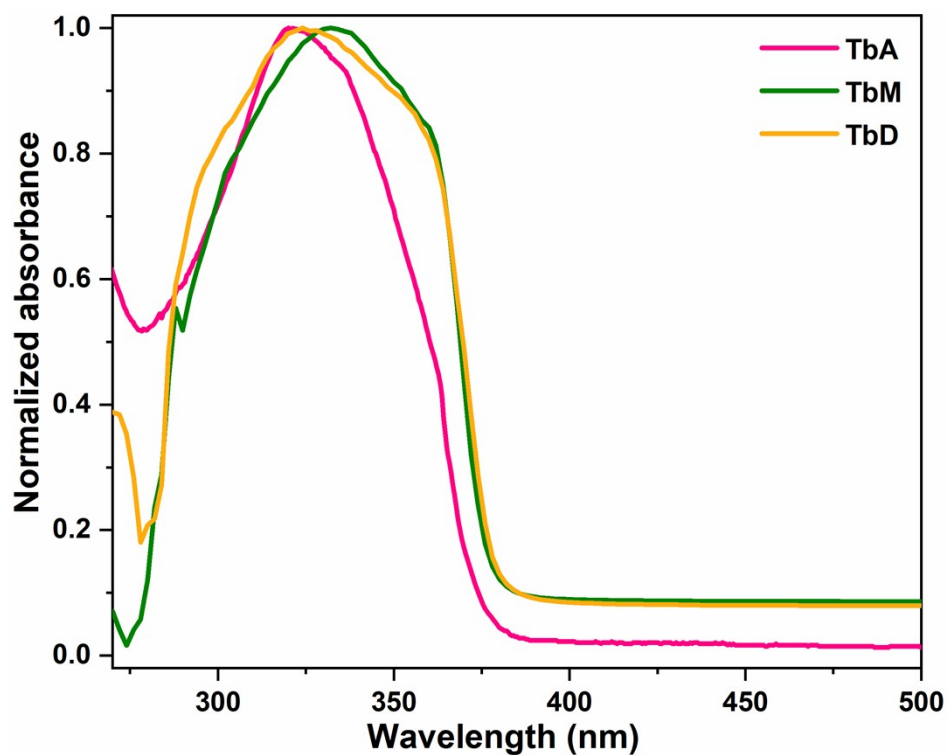

Fig. S7 UV-Absorption profiles of synthesised complexes in solid form

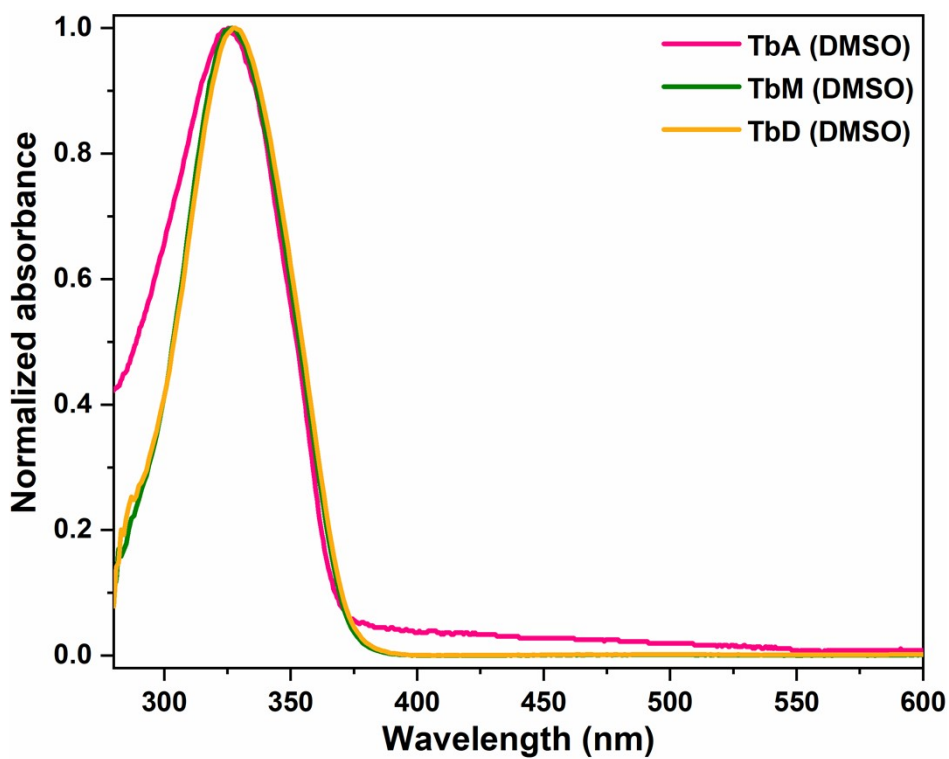

Fig. S8 UV-Absorption profiles of synthesised complexes in DMSO
